# Supplementary material for: Bio-Hybrid Hydrogels Incorporated into a System of Salicylic Acid-pH/Thermosensitive Nanocarriers Intended for Cutaneous Wound-Healing Processes
Source: MDPI journal article supplement (doi:10.3390/pharmaceutics14040773), 2022-04-01
Supplement: s1 [file s1]

# Supplementary Materials: Bio-Hybrid Hydrogels Incorporated into a System of Salicylic Acid– pH/Thermosensitive Nanocarriers Intended for Cutaneous Wound-Healing Processes

Katarzyna Bialik-Wąs, Małgorzata Miastkowska, Paulina Sapuła, Klaudia Pluta, Dagmara Malina, Jarosław Chwastowski and Mateusz Barczewski

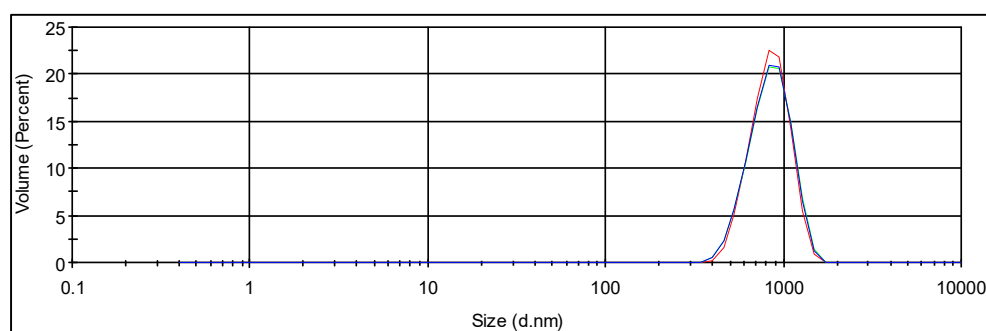

**Figure S1.** The average particle size distribution of the system of pH-sensitive nanocarriers-salicylic acid.

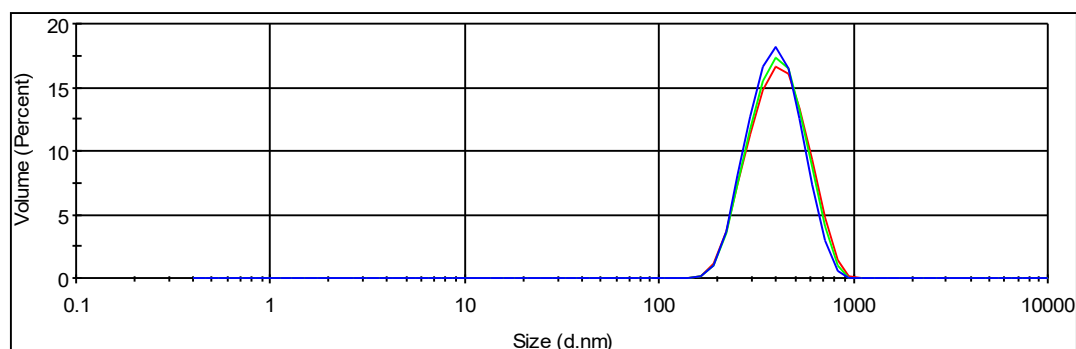

**Figure S2.** The average particle size distribution of the system of thermosensitive nanocarriers-salicylic acid.

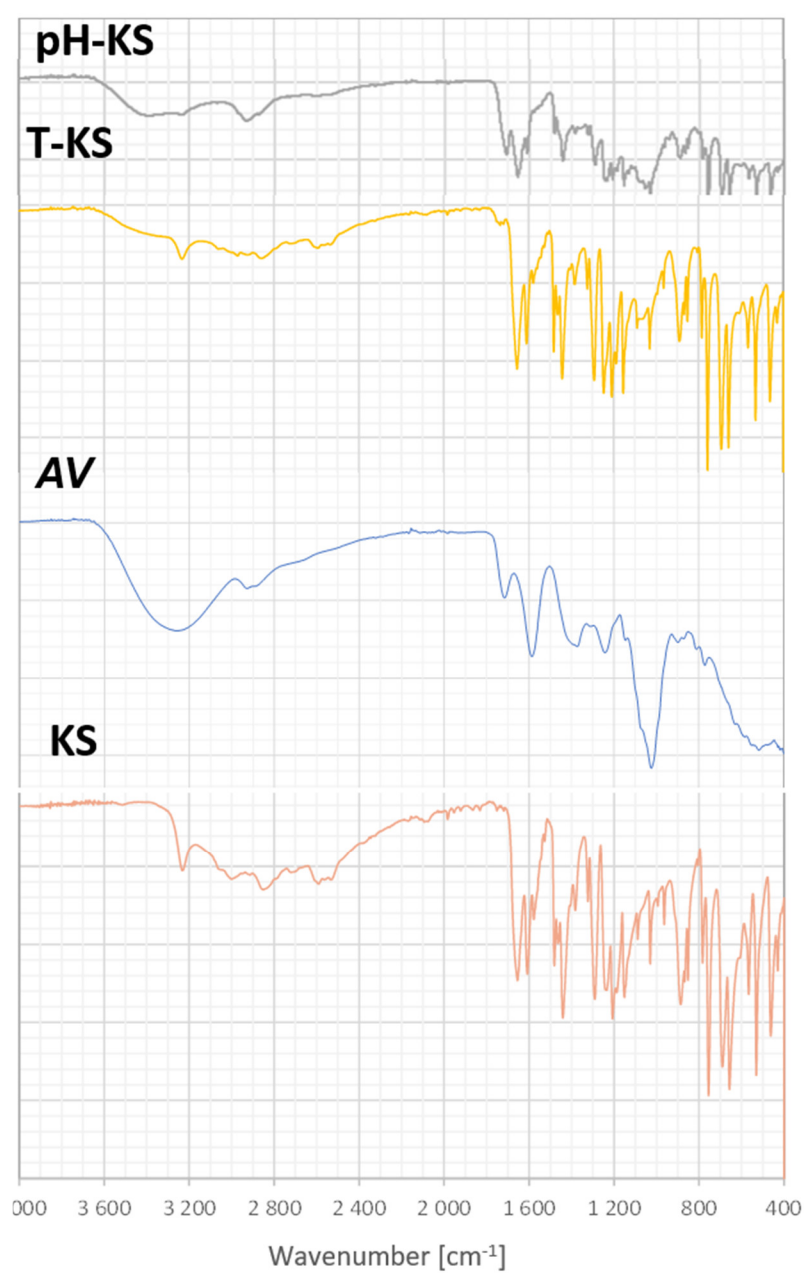

**Figure S3.** FT-IR spectra of the system of T-SA and pH-SA, salicylic acid (SA), and *Aloe vera* (AV).
